# Supplementary material for: Silane-Treated Basalt Fiber–Reinforced Poly(butylene succinate) Biocomposites: Interfacial Crystallization and Tensile Properties
Source: MDPI journal article supplement (doi:10.3390/polym9080351), 2017-08-09
Supplement: s1 [file s1]

## Supporting Information

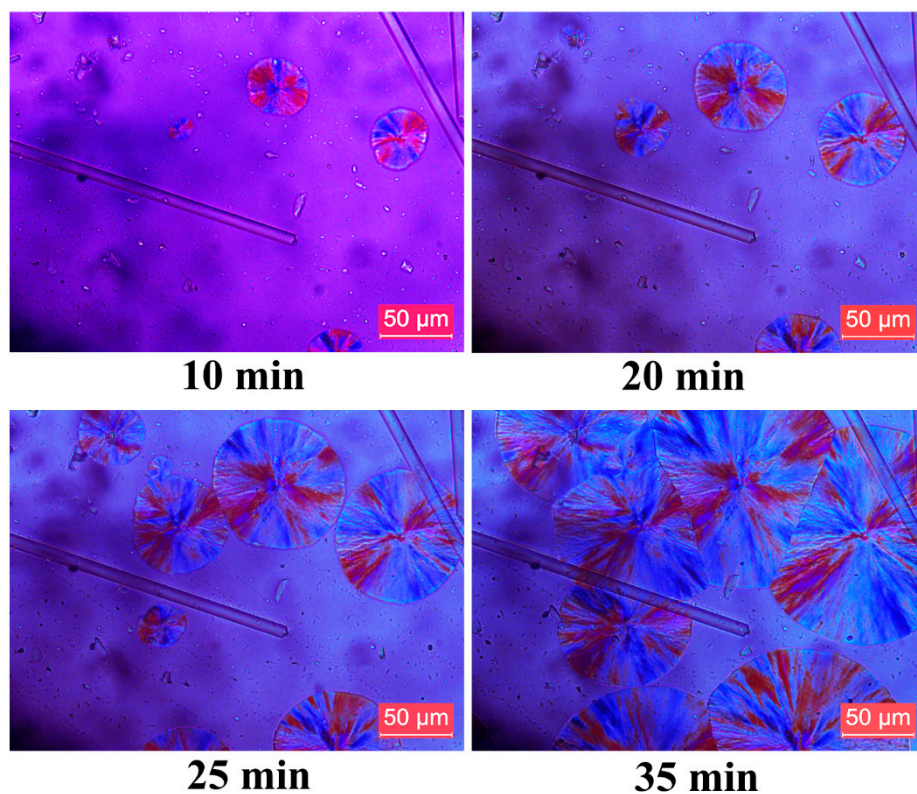

**Figure S1.** The growth of polymeric matrix (PBS) spherulites in the presence of pristine basalt fibers crystallized at 89 °C at different times.

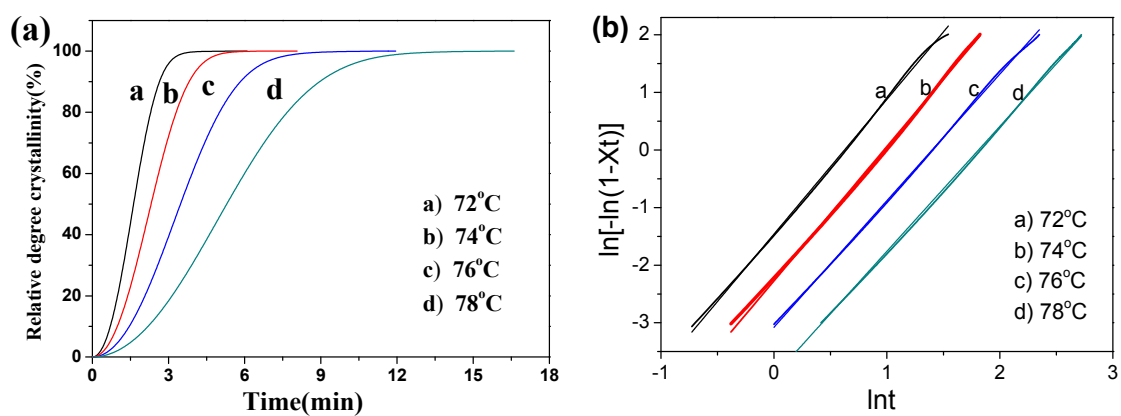

**Figure S2.** (a) Relative degree of crystallinity with time and (b) the Avrami plots of  $\ln[-\ln(1-X_t)]$  versus  $\ln t$  for isothermal crystallization of PBS/BF(95/5) at different crystallized temperatures.
